# Supplementary material for: Shallow water table effects on water, sediment and pesticidetransport in vegetative filter strips: Part A. non-uniform infiltrationand soil water redistribution
Source: Copernicus journal article supplement (doi:10.5194/hess-2017-405), 2017-08-23

## Supplementary materials

### S1. Program distribution.

Free open source code, documentation and sample applications can be downloaded from <http://abe.ufl.edu/carpaena/software/swingo.shtml>

## S2. SWINGO algorithm flowchart

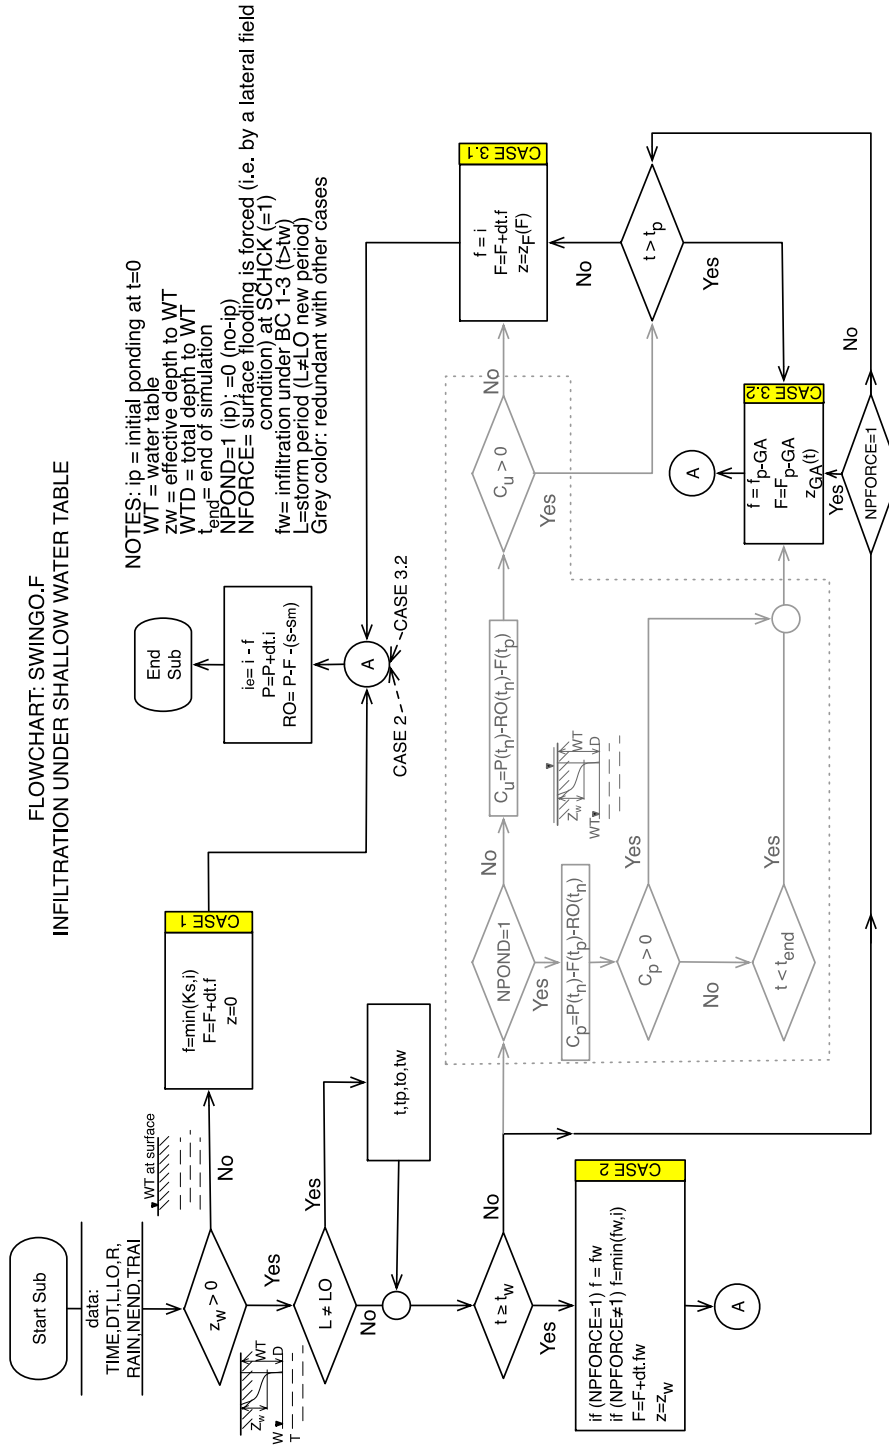

Supplement: Supplementary file 1 [file hess-2017-405-supplement.pdf]
