# Supplementary material for: Shallow water table effects on water, sediment and pesticidetransport in vegetative filter strips: Part A. non-uniform infiltrationand soil water redistribution
Source: Copernicus journal article supplement (doi:10.5194/hess-2017-405), 2017-08-23
Supplement: Supplementary file [file hess-2017-405-AC2-supplement.zip]

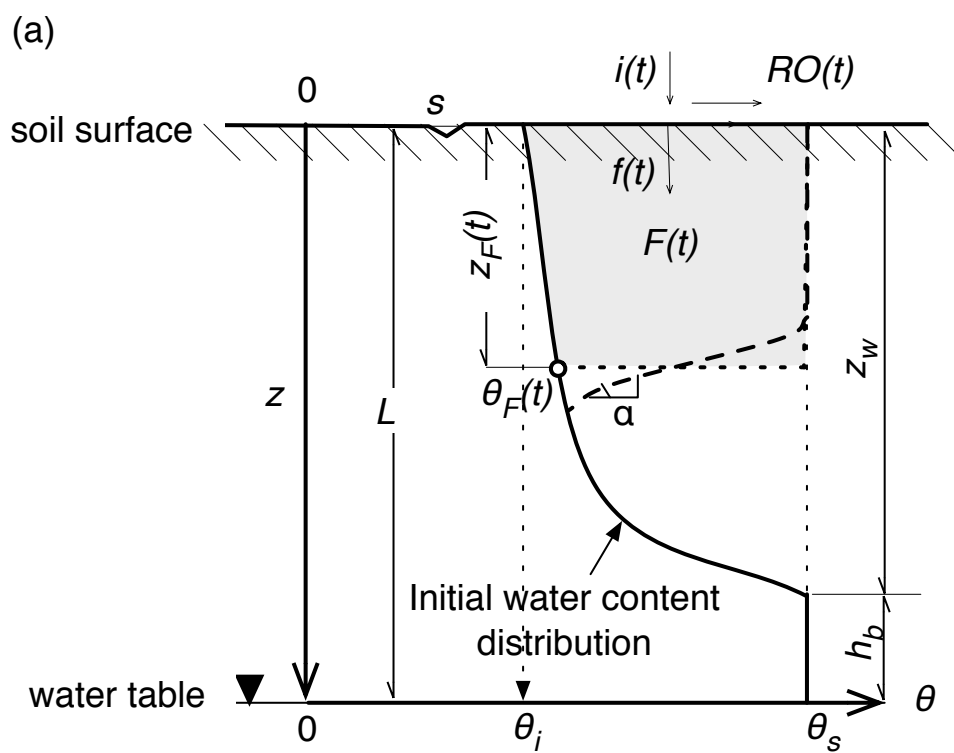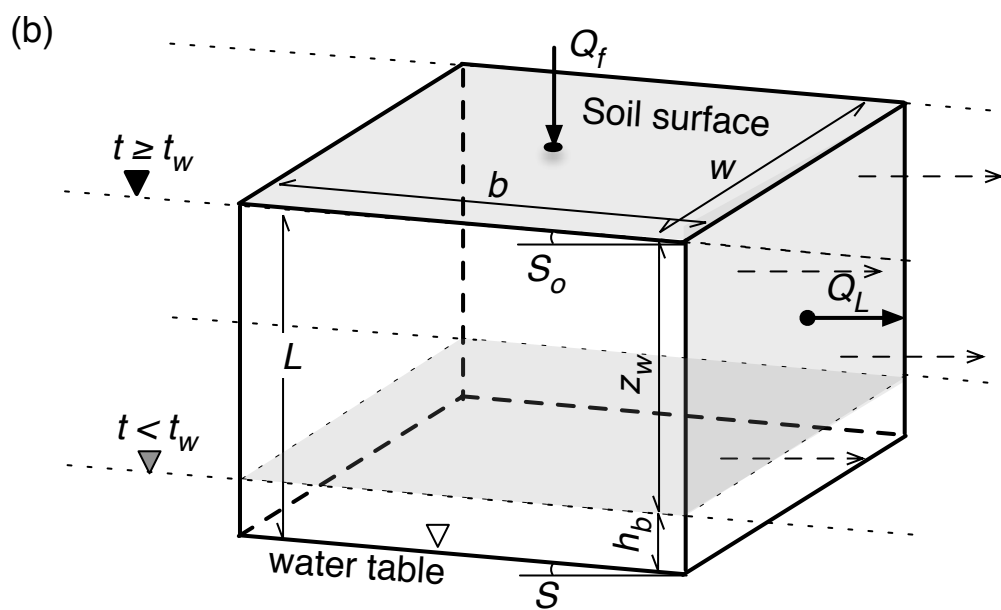

FIG. 1

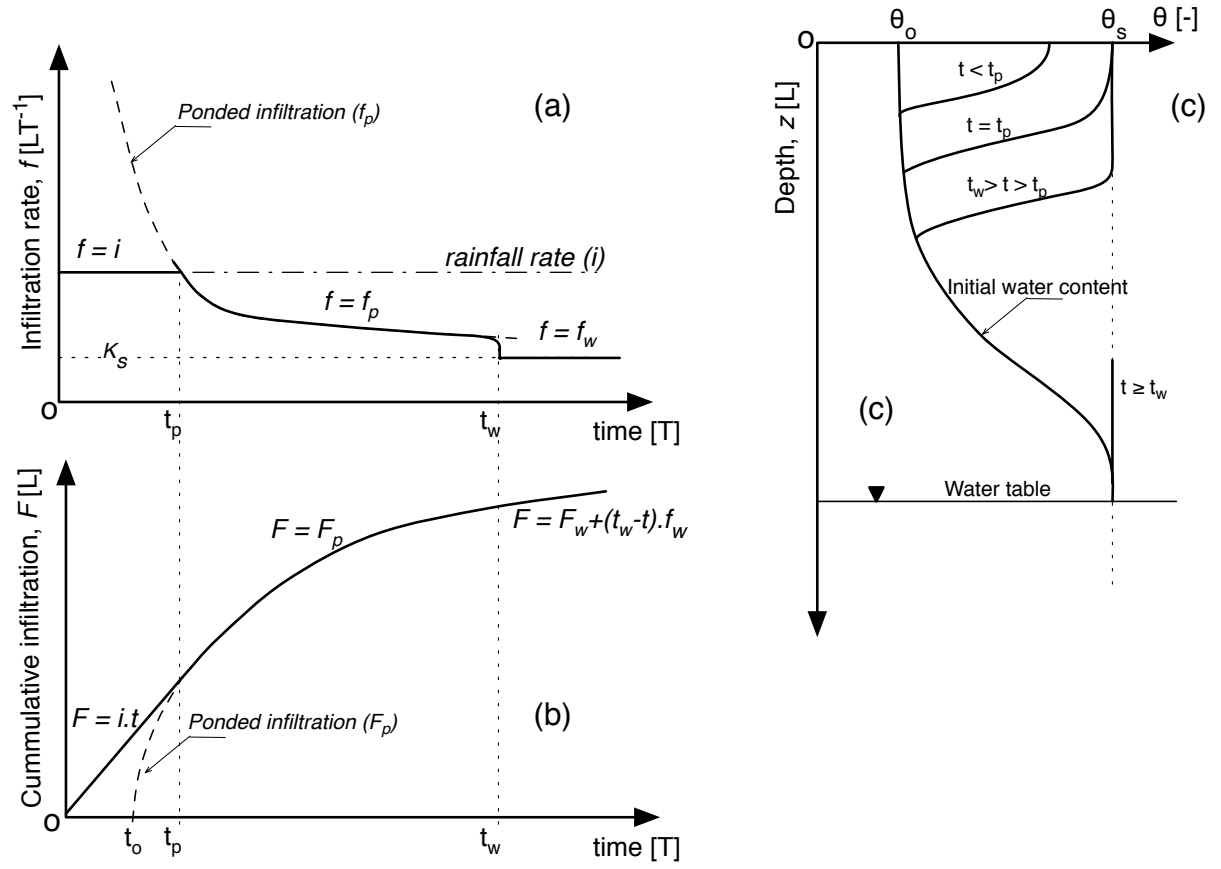

FIG. 2

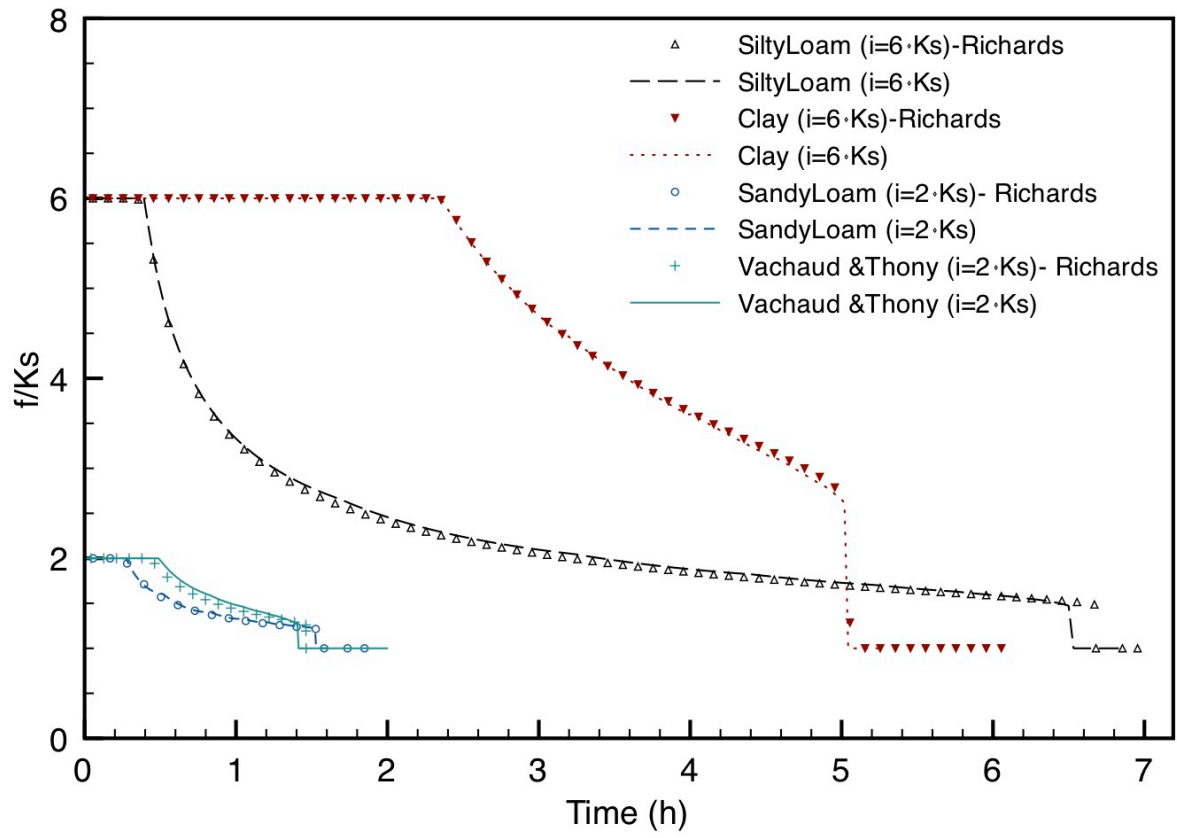

FIG. 3

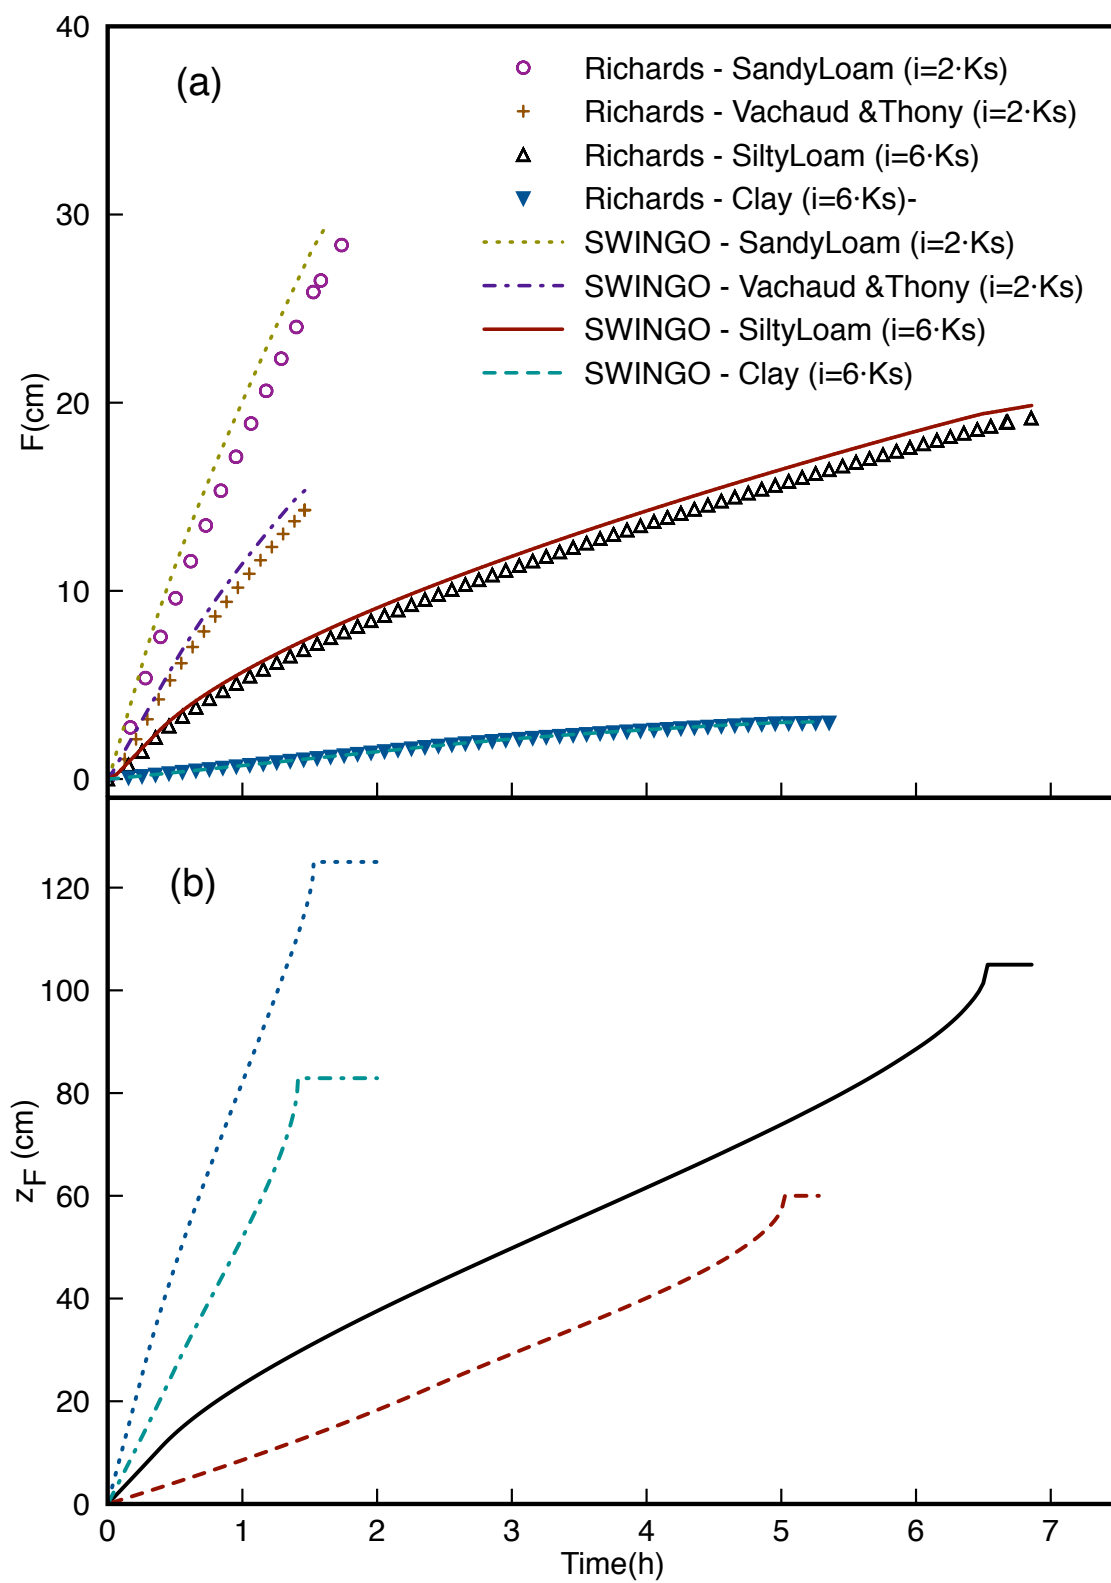

FIG. 4

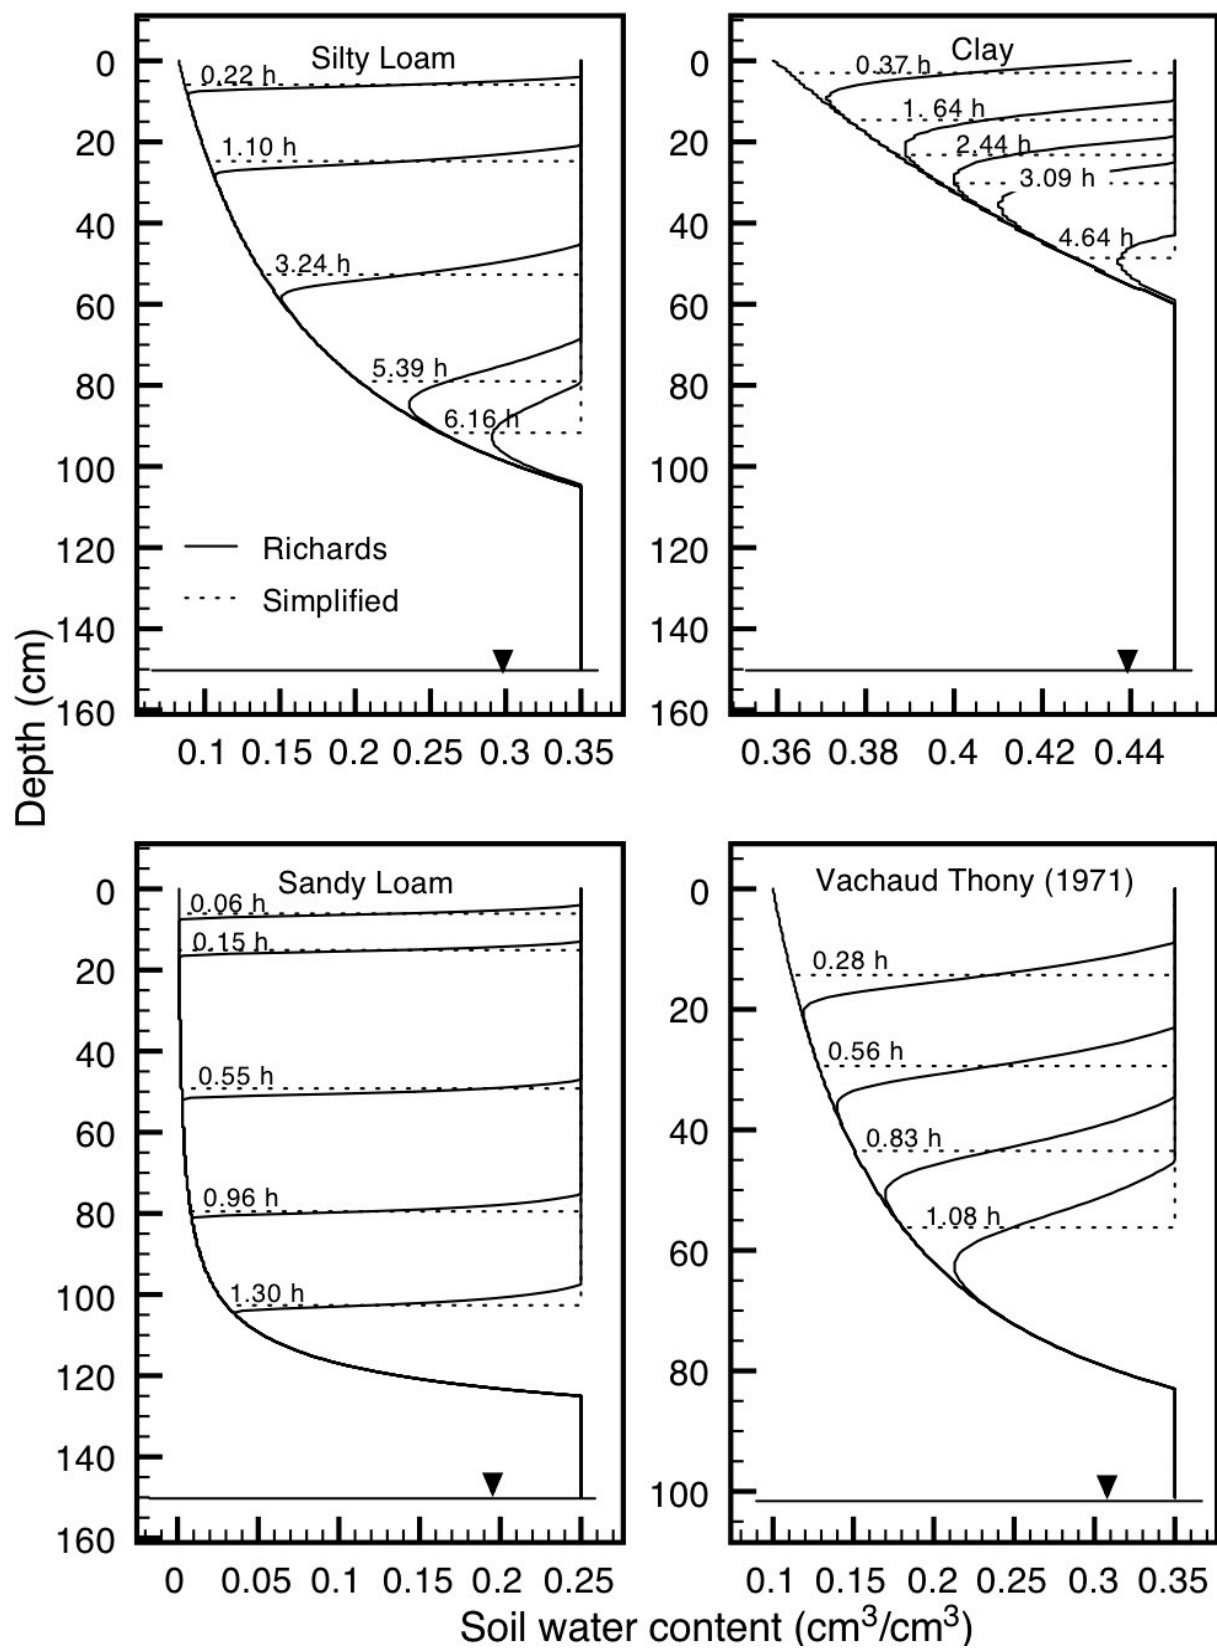

FIG. 5

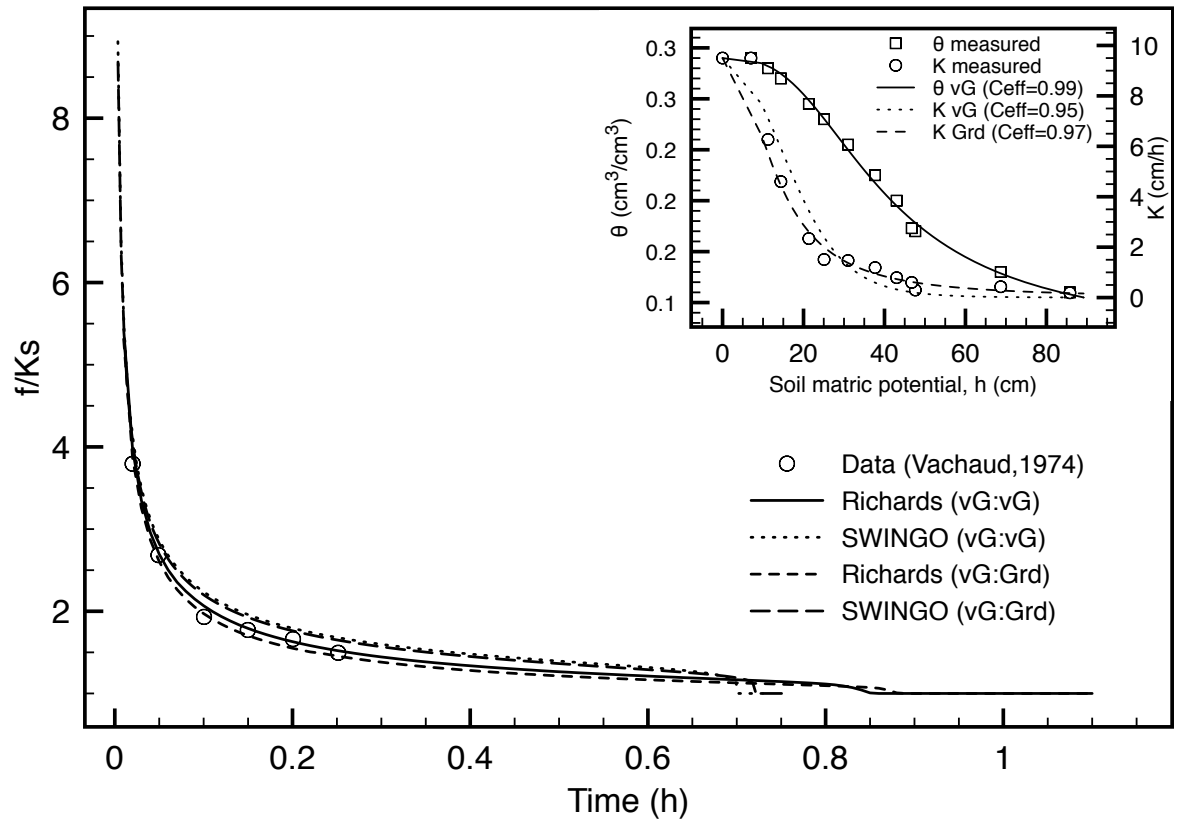

FIG. 6

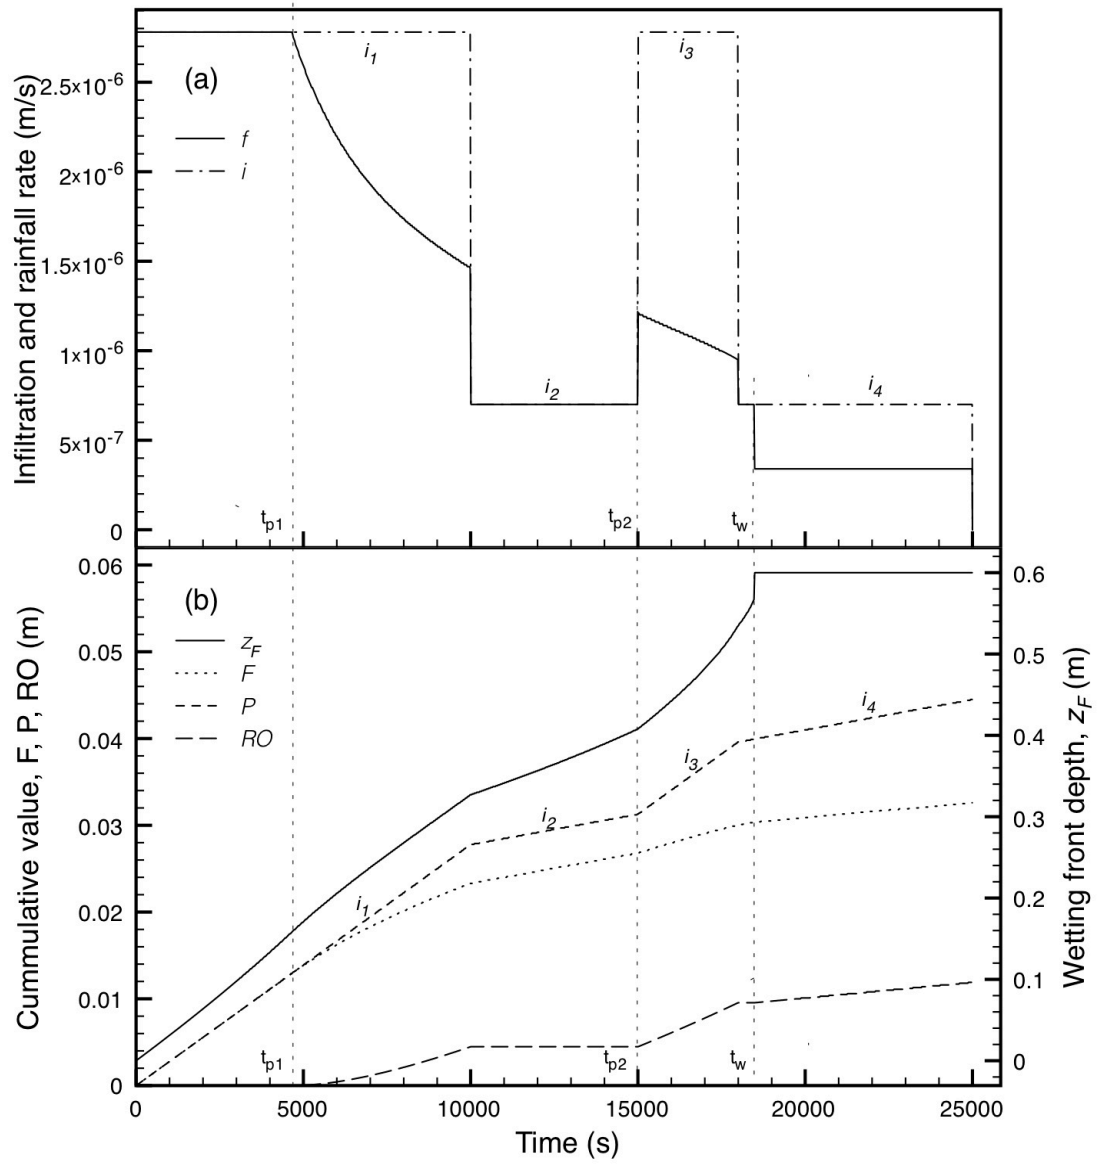

FIG. 7

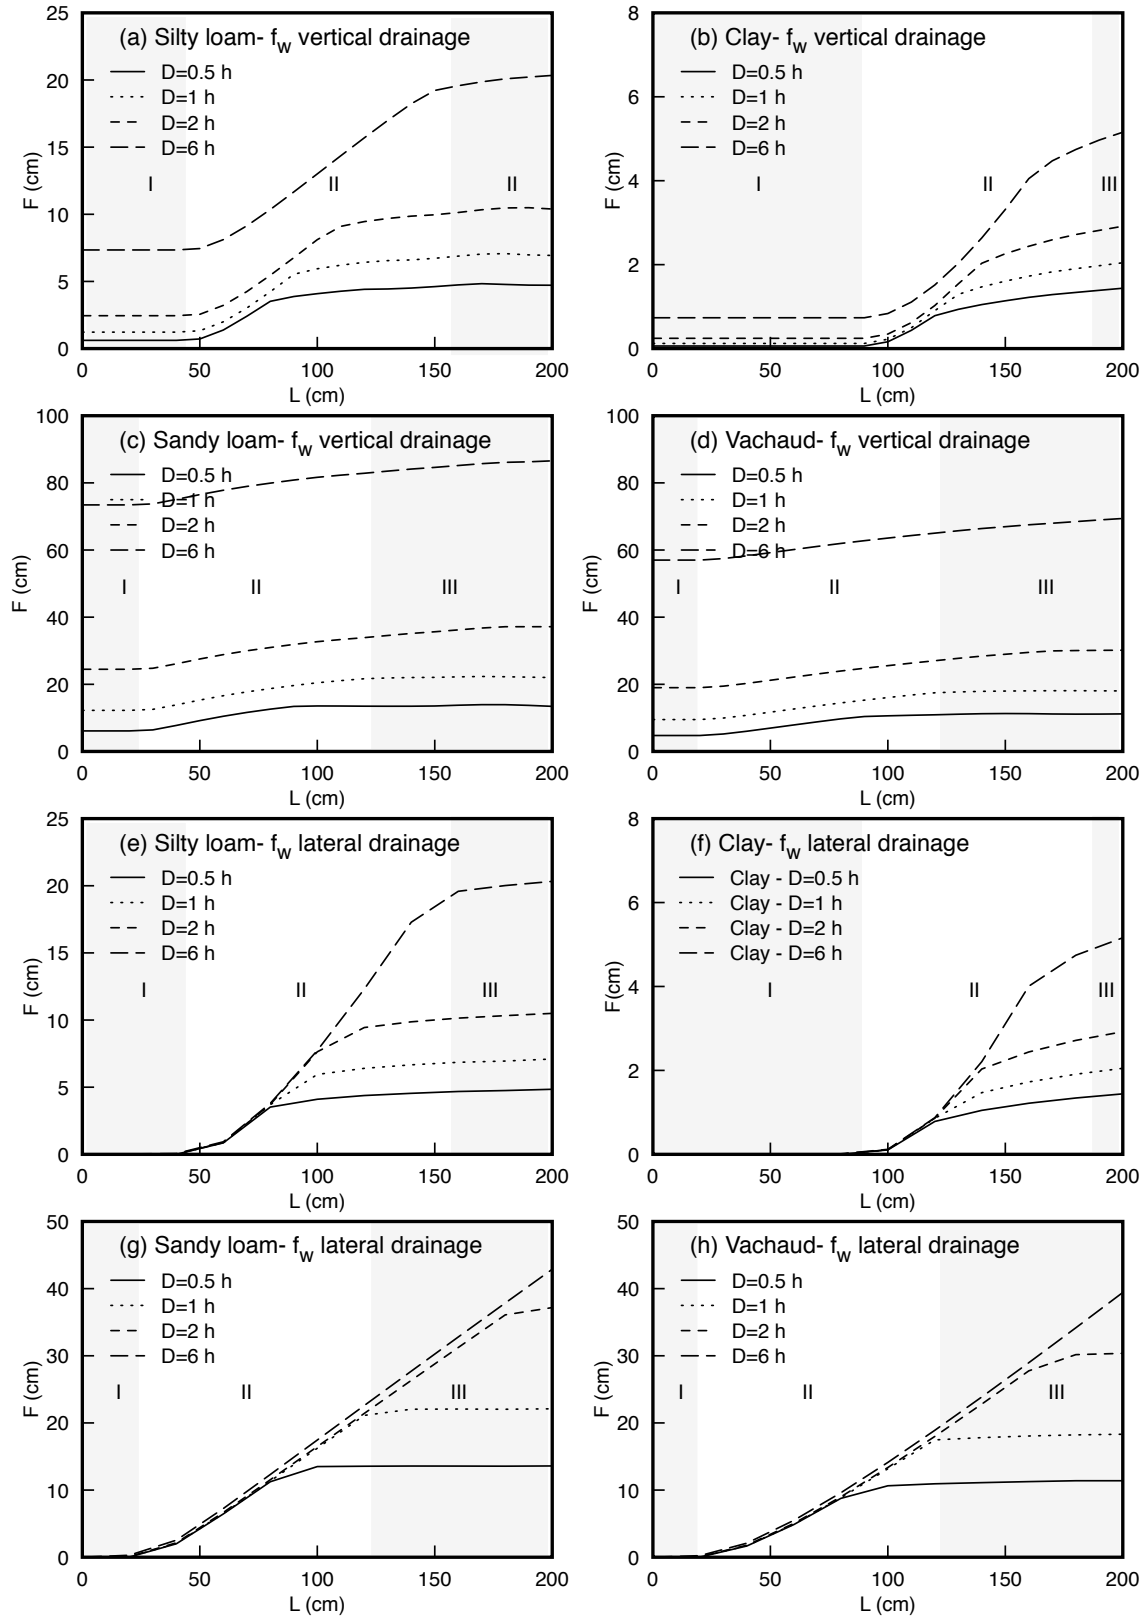

FIG. 8



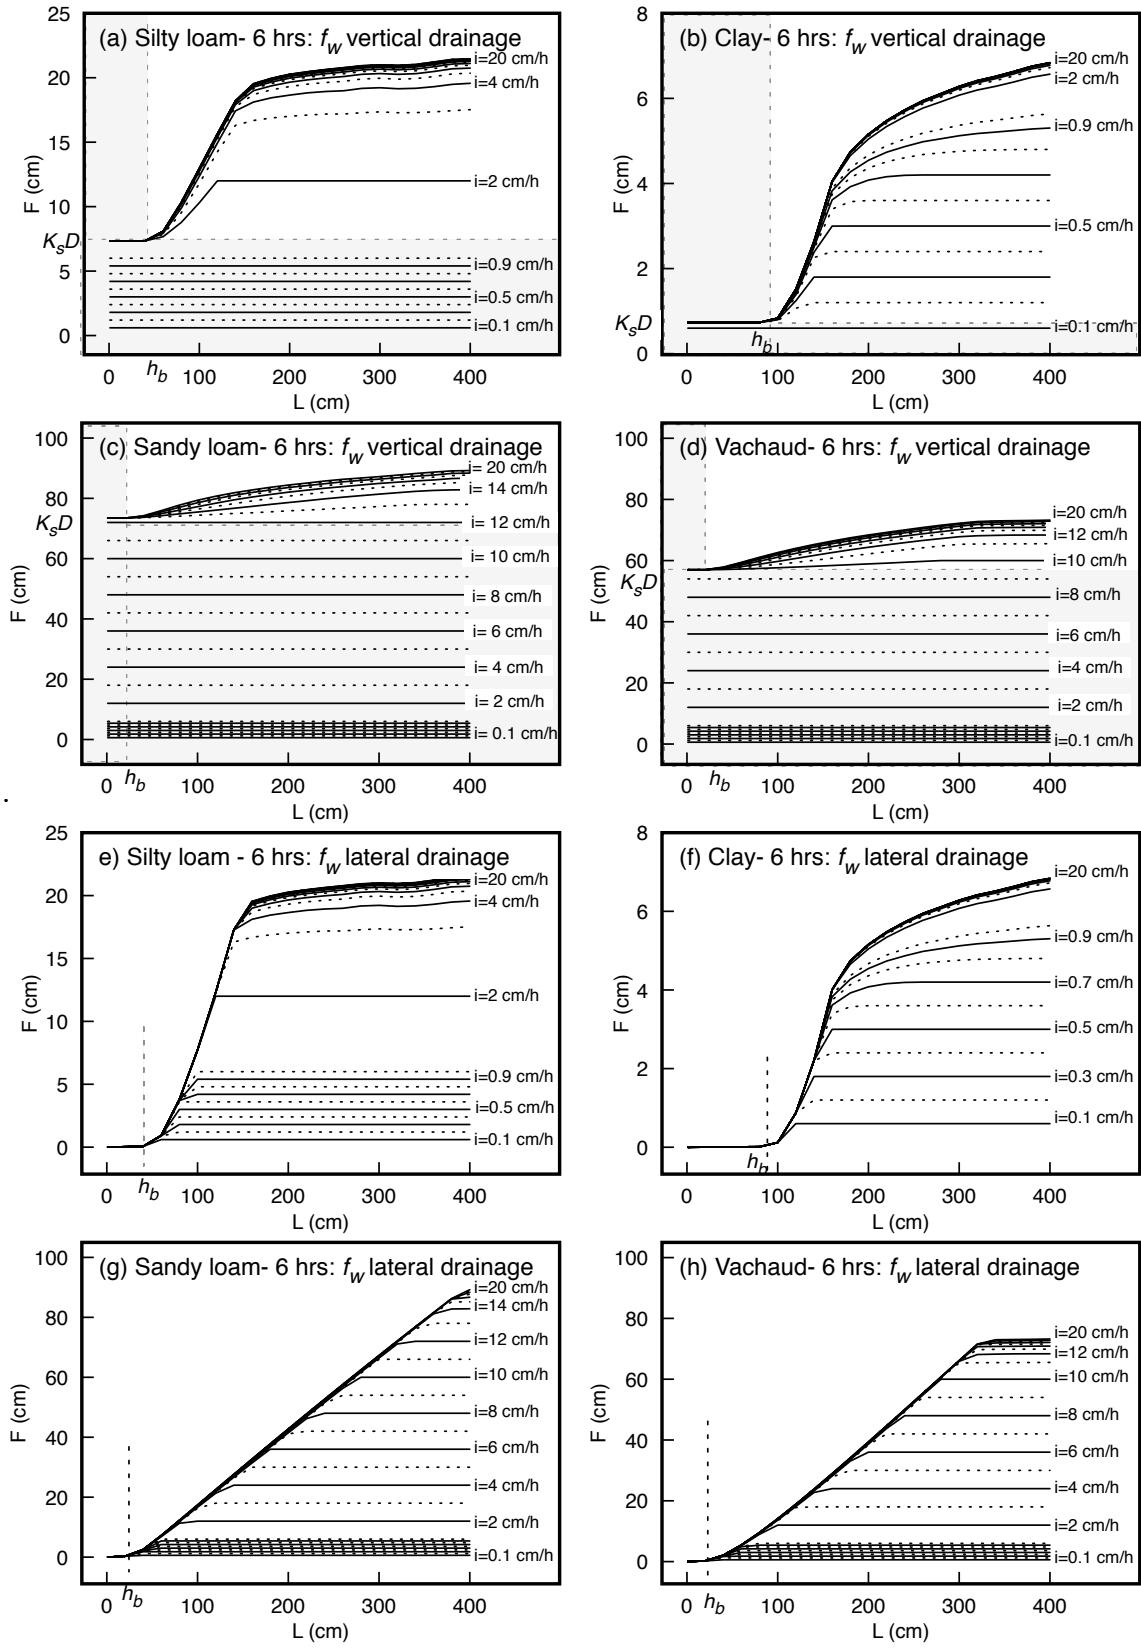

FIG. 9
